# Supplementary material for: Molecular phylogeny and evolutionary history of Moricandia DC (Brassicaceae)
Source: PeerJ journal article supplement (doi:10.7717/peerj.3964), 2017-10-27

## Molecular phylogeny and evolutionary history of *Moricandia* DC (Brassicaceae)

Francisco Perfectti, José M. Gómez, Adela González-Megías, Mohamed Abdelaziz and Juan Lorite

### Supplementary information

**Table S1:** GenBank accessions

**Table S2:** Comparison between the proposed new species *Moricandia rytidocarpoides* and *Rytidocarpus moricandioides* (N. Africa) for several quantitative morphological traits.

**Table S3:** Comparison of the proposed new species *Moricandia rytidocarpoides* with the most related species within the genus and with *Rytidocarpus moricandioides* from North Africa.

**Table S4:** Additional examined specimens.

**Figure S1:** Maximum likelihood tree produced with the complete 24-samples set. Branch labels represent bootstrap percentage values. Scale: mean expected rates of substitution per site.

**Figure S2:** Tanglegram showing the maximum likelihood inference trees obtained from cpDNA (ndhF + trnT-trnF) and nuclear (ITS1 + ITS2) sequences.

**Figure S3:** Biplots showing the result of non-metric multidimensional scaling (NMDS) for individuals (left) and variables (right) performed with the morphological data presented in Supplementary table 2. Model data in the left are referred to the result of a Permutational Multivariate analysis using species as factor.

**Figure S4:** Microphotography of fruits of *M. rytidocarpoides* (left) and *R. moricandioides* (right). Fruits (a and b) and detail of fruit valve (c and d). Central insert (c) shows size differences of the fruit.

**Table S1.** GenBank accessions

| Taxon                                           | Sample          | GenBank accessions |             |                  |
|-------------------------------------------------|-----------------|--------------------|-------------|------------------|
|                                                 |                 | <i>ITS</i>         | <i>ndhF</i> | <i>trnT-trnF</i> |
| <i>Eruca pinnatifida</i>                        | Erupinn01-15-01 | MF192766           | MF192790    | MF192814         |
|                                                 | Erupinn02-15-01 | MF192767           | MF192791    | MF192815         |
| <i>Eruca vesicaria</i>                          | Eruves01-15-01  | MF192768           | MF192792    | MF192816         |
| <i>Moricandia arvensis</i>                      | Mar01-14-01     | MF192771           | MF192795    | MF192819         |
|                                                 | Mar33-05-01     | MF192772           | MF192796    | MF192820         |
|                                                 | Mar35-13-01     | MF192773           | MF192797    | MF192821         |
|                                                 | Mar38-05-01     | MF192774           | MF192798    | MF192822         |
|                                                 | Mar42-05-01     | MF192775           | MF192799    | MF192823         |
| <i>Moricandia suffruticosa</i>                  | Msu01-14-01     | MF192776           | MF192800    | MF192824         |
| <i>Moricandia foetida</i>                       | Mfo01-14-01     | MF192788           | MF192812    | MF192836         |
|                                                 | Mfo02-13-01     | MF192789           | MF192813    | MF192837         |
| <i>Moricandia foleyi</i>                        | Mfy01-15-01     | MF192769           | MF192793    | MF192817         |
|                                                 | Mfy02-15-01     | MF192770           | MF192794    | MF192818         |
| <i>Moricandia moricandioides baetica</i>        | Mmob01-14-01    | MF192779           | MF192803    | MF192827         |
| <i>Moricandia moricandioides gienensis</i>      | Mmog06-12-01    | MF192780           | MF192804    | MF192828         |
| <i>Moricandia moricandioides moricandioides</i> | Mmom05-12-01    | MF192781           | MF192805    | MF192829         |
| <i>Moricandia moricandioides pseudofoetida</i>  | Mmsf01-15-01    | MF192782           | MF192806    | MF192830         |
|                                                 | Mmsf02-15-01    | MF192783           | MF192807    | MF192831         |
| <i>Moricandia spinosa</i>                       | Mspi01-14-01    | MF192777           | MF192801    | MF192825         |
| <i>Moricandia nitens</i>                        | Mni03-14-01     | MF192778           | MF192802    | MF192826         |
| <i>Rytidocarpus moricandioides</i>              | Rmorm01-14-01   | MF192787           | MF192811    | MF192835         |
|                                                 | Rmorg02-14-01   | MF192786           | MF192810    | MF192834         |
| <i>Moricandia rytidocarpoides</i>               | Rmorg01-13-01   | MF192784           | MF192808    | MF192832         |
|                                                 | Rmorg01-14-01   | MF192785           | MF192809    | MF192833         |

**Table S2.** Comparison between the proposed new species *Moricandia rytidocarpoides* and *Rytidocarpus moricandioides* (from Morocco) for several quantitative morphological traits (mean±SE). P-values have been obtained after GLMs (using family Gaussian for continuous data and Poisson for counting). n.s. = not significant (P>0.05).

|                               | <i>M. rytidocarpoides</i> | <i>R. moricandioides</i> | <i>P-value</i>    |
|-------------------------------|---------------------------|--------------------------|-------------------|
| No. stems                     | 1.13±0.06 (n=63)          | 2.29±0.57 (n=7)          | <b>0.0178</b>     |
| Plant height (cm)             | 31.12±1.76 (n=63)         | 43.78±4.33 (n=7)         | <b>0.0251</b>     |
| Lower leaves length (mm)      | 53.92±3.42 (n=63)         | 79.93±15.97 (n=7)        | <b>0.0266</b>     |
| Lower leaves width (mm)       | 14.58±1.44 (n=63)         | 38.02±5.37 (n=7)         | <b>&lt;0.0000</b> |
| Upper laves length (mm)       | 12.69±1.76 (n=63)         | 15.76±1.66 (n=7)         | n.s.              |
| Upper laves width (mm)        | 2.75±0.31 (n=63)          | 5.16±0.68 (n=7)          | <b>0.0152</b>     |
| No. flowers per inflorescence | 7.9±0.3 (n=63)            | 11.5±1.45 (n=7)          | <b>0.0034</b>     |
| No. flowers per plant         | 60.17±5.97 (n=63)         | 128.14±44.5 (n=7)        | <b>&lt;0.0000</b> |
| Flower pedicel length (mm)    | 4.12±0.11 (n=63)          | 6.38±0.27 (n=7)          | <b>&lt;0.0000</b> |
| Sepal length (mm)             | 7.63±0.35 (n=51)          | 11.42±0.52 (n=7)         | <b>&lt;0.0000</b> |
| Sepal width (mm)              | 2.16±0.11 (n=51)          | 2.65±0.28 (n=7)          | n.s.              |
| Petal length (mm)             | 13.26±0.51 (n=51)         | 23.01±1.84 (n=7)         | <b>&lt;0.0000</b> |
| Petal width (mm)              | 3.87±0.21 (n=51)          | 8.18±1.53 (n=7)          | <b>&lt;0.0000</b> |
| Long stamen length (mm)       | 10.4±0.25 (n=51)          | 13.9±0.86 (n=7)          | <b>&lt;0.0000</b> |
| Short stamen length (mm)      | 8.40±0.24 (n=51)          | 11.08±0.95 (n=7)         | <b>&lt;0.0000</b> |
| Fruit length (mm)             | 13.64±0.18 (n=58)         | 24.45±0.82 (n=7)         | <b>&lt;0.0000</b> |
| Fruit width (mm)              | 3.20±0.11 (n=58)          | 4.25±0.50 (n=7)          | <b>0.0075</b>     |
| No. seeds per fruit           | 19.00±0.74 (n=37)         | 39.67±4.59 (n=6)         | <b>&lt;0.0000</b> |
| Seeds length (mm)             | 1.27±0.02 (n=39)          | 1.30±0.04 (n=6)          | n.s.              |
| Seed width (mm)               | 0.75±0.02 (n=39)          | 0.88±0.06 (n=6)          | <b>0.0280</b>     |

**Table S3.** Comparison of the proposed new species *Moricandia rytidocarpoides* with the most related species within the genus and with *Rytidocarpus moricandioides* from North Africa.

|                            | <i>M. moricandioides moricandioides</i>                                      | <i>M. foetida</i>                                                          | <i>M. rytidocarpoides</i> (SE Spain)                                              | <i>R. moricandioides</i> (Africa)                                                |
|----------------------------|------------------------------------------------------------------------------|----------------------------------------------------------------------------|-----------------------------------------------------------------------------------|----------------------------------------------------------------------------------|
| <b>Habit</b>               | Annual to biannual (suffruticose at base)                                    | Annual                                                                     | Annual                                                                            | Annual                                                                           |
| <b>Plant height (cm)</b>   | Up to 80                                                                     | Up to 50                                                                   | Up to 75                                                                          | Up to 60                                                                         |
| <b>Lower leaves</b>        | Rosette, sub-sessile, obovate with sinuate-dentate margin<br>20-99 x 9-80 mm | Rosette forming, sub-sessile, obovate with dentate margin<br>30-75 x 20-40 | Rosette forming, sub-sessile with lobate to pinnatifid margin<br>13-175 x 2-81    | Rosette, ovate-oblongue, obtuse with sinuate to dentate margin<br>10-147 x 18-55 |
| <b>Upper leaves (mm)</b>   | Chordate-amplexicaule, acute to obtuse at the apex<br>10-40 x 10-30          | Chordate-amplexicaule, markedly acute at the apex<br>12-24 x 8-15          | Chordate to sagittate, amplexicaule, markedly acute at the apex<br>10-14 x 0.9-12 | Chordate-amplexicaule, acute at the apex<br>13-18 x 4-8                          |
| <b>Inflorescence shape</b> | Racemose-no flexuose                                                         | Recemose-flexuose                                                          | Racemose, no flexuose                                                             | Racemose, no flexuose                                                            |
| <b>Nº flowers</b>          | c. 60                                                                        | c. 15                                                                      | c. 60                                                                             | c. 128                                                                           |
| <b>Sepal</b>               | Purple, corniculate at the apex, gibose at the base                          | Purplish, obtuse at the apex, gibose at the base                           | Green-light purplish, acute at the apex, gibose at the base                       | Purplish, acute at the apex, gibose at the base                                  |
| <b>Sepal (mm)</b>          | 11.5-15 x 2.2-4                                                              | 8-10.2 x 1.5-2.4                                                           | 7.1-10.3 x 1-2.5                                                                  | 9.3-13.1 x 2.3-3.9                                                               |
| <b>Petal (mm)</b>          | c. 25(18-29)                                                                 | c. 12 (9-20)                                                               | c. 13(7-23)                                                                       | c. 23(14-28)                                                                     |
| <b>Petal color</b>         | Purple-purplish                                                              | White-light purplish                                                       | Light purplish                                                                    | Purple                                                                           |
| <b>Fruit (mm)</b>          | 60-140 x 1.1-3                                                               | 40-65 x 1.1-2.4                                                            | 9.5-16 x 3-3.4                                                                    | 17-28 x 3.7-4.8                                                                  |
| <b>Fruit pedicel (mm)</b>  | c. 6.5                                                                       | c. 10                                                                      | c. 4.1                                                                            | c. 6.4                                                                           |
| <b>Fruit valve</b>         | Smooth with 1 nerve                                                          | Smooth with 1 nerve                                                        | Markedly reticulate with 1 nerve                                                  | 3-5 nerves                                                                       |
| <b>Seeds</b>               | Uniseriate at each locule<br>Narrowly alate                                  | Uniseriate<br>Narrowly alate                                               | Biseriate<br>Narrowly alate                                                       | Biseriate<br>Narrowly alate                                                      |
| <b>Seeds per fruit</b>     | 32 (21-52)                                                                   | 29 (19-40)                                                                 | 19(11-30)                                                                         | 40(28-58)                                                                        |
| <b>Seed size (mm)</b>      | 1.2-2.4 x 1-1.4                                                              | 1.3-1.8 x 1.0-1.3                                                          | 1.1-1.65 x 0.4-1.1                                                                | 1.2-1.5 x 0.8-1.1                                                                |
| <b>Habitat</b>             | Dry and semiarid areas over marls, clays and limestones                      | Semiarid hills over marls often with gypsum                                | Dry and semiarid hills over marls                                                 | Dry crop fields and hills over marls                                             |
| <b>Alt. range (m)</b>      | 300-700                                                                      | 0-400                                                                      | 400-800                                                                           | 250-700                                                                          |

**Table S4.** Additional examined specimens.

***Eruca foleyi* stat. nov. (Sub. *Moricandia foleyi* Batt.):** MOROCCO: c. Ain Zora, Mtalsa, GDA28422, 850 m, 1929-10-26, Font Quer; prox. Merzouga, 700 m, 31°3.5' N / 4° 0.7' W, ramblas arenosas desérticas, GDA62593, 12/04/2014, M. Abdelaziz, M.J. Gómez, J. Lorite & F. Perfectti; Prox. Merzouga, 700 m, 31°3.5' N / 4° 0.7' W, Ramblas arenosas desérticas, GDA62594, 18/02/ 2014, M. Abdelaziz, M.J. Gómez, J. Lorite & F. Perfectti ; Carretera entre Rissani y Merzouga, 700 m, 31°16.9' N / 4° 16.5' W, Ramblas arenosas desérticas, GDA62595, 12/04/ 2014, M. Abdelaziz, M.J. Gómez, J. Lorite & F. Perfectti.

***Moricandia arvensis* (L.) DC.:** FRANCE: Éze s/mer (AM), 1964-01-06, MA, MA194666, Gavelle; ISRAEL: Southern Negev, 8 Km SE of Mizpe Ramon, Nahal Gevanim, 1989-03-29, SEV218603, F. Amich, A. Danin, S.G. Gardner & B. Valdés; ITALY: Nebrodi: Portella Femmina Morta, 37.9° N / 14.48° W, 1550 m, 1990-06-09, SEV254568, F.M. Raimondo, S.L. Jury, R.M. Gebauer, A. Charpin, S. Brullo et al. MOROCCO: Ouezzane. Mjara, entre Ain Dorij y Teroual, 34.64° N / -5.28° W, 160 m, 2004-05-22, SEV251241, Márquez, F.J. Pina, C. Santa-Bárbara & B. Valdés; Er Rachidia road N of Erfoud, 59 kms from Rissani, 1 km N of Ksar Jdid, 31.73° N / -4.19° W, 915 m, 2002-02-19, SEV240385, Jury et al. PORTUGAL: Silves, laderas castillo, 2011-02-26, SEV270303, E. Sánchez Gullón; SPAIN: Alicante: La Nucía, bajada a la Acequia Máre, GDA17058, 1984-11-18, L. Cano; Alicante: Santapola. GDA45717, L. Garcia-Vicente; Almería: Lúcar, Pocicos, GDAC43378, 1995-6-3. Fco. Navarro Reyes; Almería: Lúcar, Rambla Lúcar, GDAC43388, 1995-7-23, Fco. Navarro Reyes; Almería: Lúcar, Montroy, GDAC43419, 1996-5-11, Fco. Navarro Reyes; Almería: Playa de Carboneras, GDAC40287, 1996-3-23, Eduardo Linares; Almería: Rambla de Paulenca, GDAC15771, 1983-1-30, M. Cueto; Almería: Rambla antes de Retamar, GDAC 15712, 1983-1-2, M. Cueto; Almería: Níjar, La Joya, GDA26054, 150 m, 1990-12-16, M.J.M. Lirola & L. Gutiérrez; Almería: Alhama de Almería: GDAC29177, 450 m, 1988-11-14, G. Blanca; Almería: Enix, barranco del Palmar, GDA45718, 80 m, J. M. Román Díaz; Almería: Sª Almagrera, GDA50110, 162 m, 2005-4-14, C. Morales, C. Quesada, L. Baena & M.T. Vizoso; Almería: Carboneras. GDA26052, 5 m, 1991-6-1, M.J.M. Lirola & L. Gutiérrez; Almería: pasado Sorbas, Los Castaños, GDA51610, 356 m, 2006-3-28, C. Morales, M.T. Vizoso & G. Muñoz; Barcelona: Vallès occidental, Castellbisbal, cruce de carreteras Castellbisbal-Rubí-Molins, GDA48389, 2002-4-8, J. Vicens; Granada: Alamedilla, río Guadahortuna, GDAC40565, 800 m, 1995-7-2, C. Salazar; Granada: Baza, Barranco del Espartal, 800, 37°31.2' N / 2° 42.2' W, GDA 62592, Taludes margosos, 01/07/2016, A. Caravantes; Granada: Pedro Martínez, Mencal, Morrón Artero, GDA25107, 1050 m, 1991-6-26, R. Sánchez-Pérez; Granada: carretera Illora-Montefrío, GDA16996, 850 m, 1982-6-25, Aroza, Socorro, Negrillo; Granada: Rambla de Albuñol, cruce de la Rábita, GDAC19736, 1982-2-18, A.B. Robles & al.; Granada: entre Guadix y Purullena, GDAC19738, 1984-4-11, A.B. Robles & al.; Granada: Río Darro, debajo del Cerro del Sol, GDAC23282, 1984-7-13, A.B. Robles & al.; Granada: Guadix, Baños de Alicún, GDA50222, 850 m, 2003-6-15, M.N. Jiménez; Jaén: Sª de Alta Coloma, bajada del Puerto de las Palomas, GDAC35419, 1000 m, 1990-2-28, Pablo Navarro; Jaén: Fundación "La Cruz" de Linares, GDAC20916, 1982-4-6, J.C. Trujillo; Jaén: entre Jaén y Pegalajar, pr. Granja del huevo, GDA45723, 500 m, G. Blanca, C. Morales & C. Díaz de la Guardia; Madrid: Alcalá de Henares, 690 m, 1974-04-20, SEV41053, A. Segura-Zubizarreta; Málaga: entre Coín y Monda, GDA13276, 1977-3-20, F. Pérez Raya; Murcia: Jumilla. Finca La Esperanza, 1992-04-18, SEV218601, Z. Díaz; Murcia: Puerto de Lumbreras, Rambla del Nogaleta, GDA6157, 1970-6-24, L. Carreras & E. Valdés; Palma de Mallorca: Porto Pi, GDA, 28424, 1947-7-29, Palau Ferrer; Toledo: La Guardia, cerros del arroyo Cedrón, GDA16356, 680 m, 1982-10-17, S. Laorga; Valladolid: Parquesol, 41.63°N / -4.76° W, 1999-09-01, MA694116, J.P. Del Monte. TUNISIA: Djebel-Djeloud, 1907-01-01, 1907 m, MA50266, C.J. Pitard.

***Moricandia foetida* Bougeau ex Cosson.** SPAIN: Almería: Alsodux, GDAC41675, 1996-5-10, L. Baena; Almería: Tabernas, Llanos de Rueda, GDAC40288, 340 m 1996-3-22, Eduardo Linares; Almería: Campos de Tabernas, GDAC35766, 1990-3-9, C. Morales & al.; Almería: Tabernas, desierto de Tabernas, rambla del Búho, GDA49837, 335 m, 2004-4-6, J. Peñas; Almería: Tabernas, GDA47546, 340 m, 2003-3-29, H. Blanca; Almería: Rioja-Tabernas, GDA43587, G. Blanca, M. Cueto & M.J. Martínez; Almería: prox. de Alsodux, GDAC42352, 380 m, 1996-4-27, J. Lorite; Almería: Campos de Tabernas, GDAC14376, 1983-2-27, C. Morales; Almería: Mini-Hollywood, GDAC15711, 1983-4-26, J. Guirado; Almería: Tabernas, cerca de la Central solar, GDAC26709, 1987-3-18, C. Morales & A.T. Romero; Almería: de Tabernas a Gérgal, GDA6158, 1972-5-1, E. Valdés-Bermejo; Almería: cuevas de Almanzora, Los silos de Vera, GDA45713, 80 m, M. J. Salinas & J. Peñas; Almería: Sª Alhamilla, en la base, Campos de Tabernas, cerca de Mini Hollywood, GDAC31344, 1989-3-28, C. Morales & A.B. Robles-Cruz; Cartagena: Tallante, 1972-10-06, MA315049-2, Rivas, Esterel, Gómez & Valdés.

***Moricandia moricandioides* (Boiss.) Heywood subsp. *moricandioides*:** SPAIN: Almería: S<sup>a</sup> de Gádor, Instinción, GDAC37320-2, 550 m, 1992-5-2, A. Hervás; Almería: Adra, Río Grande, GDAC28410, 1984-2-24, J. Guirado; Almería: entre Laujar y Paterna, GDA45761, 1989-6-14, C. Morales; Córdoba: Priego, GDA6159, 1972-4-30, E. Valdés Bermejo; Almería: prox. de Ohanes, GDA52073, 700 m, 1996-11-27, J. Lorite; Almería: prox. de Canjáyar, GDA52074, 690 m, 1996-11-27, J. Lorite; Granada: Órgiva, S<sup>a</sup> de Lújar, proximidades a Barranco de los Castillejos, GDA19763, 400 m, 1987-4-17, O. Socorro & M.C. Espinar; Granada: carretera de Jaén a un km del cruce de Deifontes, GDA14627, 1982-4-14, J. Hurtado; Granada: S<sup>a</sup> Sagra, Huéscar, Cortijos de la Umbría, GDA11568, 1460 m, 1977-10-16, A.M. Negrillo; Granada: S<sup>a</sup> Lújar, cerca de Rules, GDAC19925, 1983-2-5, A.B. Robles & al.; Granada: Sacromonte, GDAC19924, 1984-7-13, A.B. Robles & al.; Granada: Alpujarra, Jorairata-Murtas, GDAC19927, 1984-3-22, J. Guirado; Granada: Galera, GDAC19928, 1984-8-9, A.B. Robles & al.; Granada: Alpujarra, entre Picena y Cherín, GDAC19929, 1984-8-4, A.B. Robles & al.; Granada: Alamedilla, GDA48298, 850 m, 2003-5-16, C. Morales, L. Baena & F.B. Navarro; Granada: alrededores de Colomera, antes de llegar al pueblo, GDA51575, 1999-3-30, C. Morales & col.; Granada: Dehesa del Generalife, Valle del río Darro, Vereda que va a Jesús del Valle, GDA51543, 914 m, 2001-3-31, C. Morales, L. Baena & R. Montiel; Granada: Loja, base del Hacho, GDA51540, 566 m, 2001-5-2, C. Morales, L. Baena & F.B. Navarro; Granada: Almegíjar, Bco. de las Tobas, de Cádiar a Torvizcón, km 41, primer barranco, orientación N, GDA51538, 742 m, 2001-4-5, C. Morales, C. Quesada, L. Baena & M.T. Vizoso; Granada: Almegíjar, próx. al puente sobre el Guadalfeo, GDA9515, 600 m, 1976-2-27, J. Molero-Mesa; Granada: Baza, Barranco del Espartal, 780 m, 37°31.2' N / 2° 42.2' W, Taludes margosos, GDA6259, 01/07/2016, A. Caravantes; Jaén, cercanías de Solera, GDAC3752, 1977-5-31, J.A. Gil, G. Blanca, F. Valle y A. Ortega; Jaén, Puente Tablas, orillas del río Guadalbullón, GDA25591, 380 m, 1986-5-12, C. Fernández; Jaén: La Cerradura, GDAC27577, 700 m, 1988-4-16, G. Blanca, Madrid: carretera de Torres de la Alameda a Villalbilla, GDA16399, 1980-4-17, Barreno, Merino, Rico & Silva; Málaga: Torcal de Antequera, GDAC3970, 1977-4-15, J. Guerra; Sevilla: Morón de la Frontera, GDAC15910, 1982-3-24 Ladero, F. Navarro, Pérez Chiscano & C. Valle.

***Moricandia moricandioides* subsp. *baetica* (Boiss. & Reut.) Sobrino-Vesperinas:** SPAIN: Almería, S<sup>a</sup> de Gádor, El Atajo, 640 m, HUAL13863, 2005-04-20, F.J. Pérez-García, J.A. Garrido & J.M. Medina-Cazorla; Granada: Saladares de El Margen, GDAC42376, 1997-5-9, M.E. González-Giménez; Jaén: entre Úbeda y Baeza, GDA45763, 1988-3-29, A.T. Romero; Jaén: entre Úbeda y Baeza, 1988, GDA45763, A.T. Romero; Jaén: Pozo Alcón, Entre P. Alcon y Baza, 1991-06-11, MGC32614, J. M. Nieto & A. V. Pérez Latorre; Málaga: Cuevas de San Marcos, Arroyo Los Puercos, 561 m, 2008-05-17, MGC68234, B. Cabezudo, A. V. Pérez Latorre, O. Gavira & M. Becerra; Málaga: La Araña. Fábrica de cemento. Zona Este 7, 50 m, 2003-03-05, O. Gavira; Málaga: Antequera, Nacimiento de la Villa, MGC52098, B. Cabezudo; Málaga: Jimera de Líbar, Carretera hacia Atajate, 540 m, MGC51567, M. Becerra; Málaga: Archidona, Hoz de Marín, 2001-02-09, MGC47891, B. Cabezudo, A. V. Pérez Latorre & O. Gavira; Málaga: Ronda, Sierra de los Merinos, Carril que sale de la carretera Ronda - El Burgo en Venta Añoreta, 1996-05-10, MGC44677, B. Cabezudo & D. Navas; Málaga: Rincón de la Victoria, El Cantal, La Cala del Moral, 1974-02-23, MGC MGC1195, A. Asensi & B. D. Garretas;

***Moricandia moricandioides* subsp. *cavanillesiana* (Font Quer & A. Bolòs) Greuter & Burdet.** SPAIN: Lérida: Torcal de Montmareu. GDA7638, 1969-7-1, L. Carreras & E. Valdés Bermejo; Zaragoza: Caspe, laderas margosas sobre el Guadalupe, junto al puente de la carretera a Maella, 41.2°N / 0.01 °W, 140 m, 4-10-93, MA523438, V.J. Arán & M<sup>a</sup>.J. Tohá; Zaragoza: Cerca de Osera, 1973-04-29, MA395272, J. Fernández-Casas.

***Moricandia moricandioides* subsp. *giennensis* Valdes.** SPAIN: Jaén: Colegio Universitario, GDA24437, 440 m, 1984-4-2, C. Fernández; Jaén: alrededores, GDA6168, 1972-4-29, E. Valdés Bermejo; Granada: entre la Malá y el Cruce de Escúzar, GDAC19923, 1984-4-9, A.B. Robles & al.; Granada, carretera Granada-Pantano de los Bermejales, GDAC19922, 1984-4-17, A.B. Robles; Granada, prox. a la Malahá, GDAC19921, 1982-4-8, A.B. Robles; Granada, Zújar, Guadiana Menor, GDAC19920, 1984-8-8, A.B. Robles & al.

***Moricandia moricandioides* subsp. *pseudofotida* Sánchez-Gómez, M.A. Carrión, A. Hern. & J. Guerra** SPAIN: Murcia, Embalse de los Rodeos, 38.07 °N / 1.0 ° W, 2009-03-16, MUB108945, P. Sánchez-Gómez, J. B. Vera & J.L. Cánovas; Murcia, Cehegin, La Atalaya, 37.973 °N / 1.0 ° W, 2000-06-05, MUB105866, P. Sánchez-Gómez; Murcia: Puerto del Garruchal, 37.954 °N / 1.0 ° W, 2003-03-25, MUB105856, M. A. Carrión, J. A. López & J. Moya; Murcia: Barranco de la Mina, 37.945 °N / 1.20 ° W, MUB105853, P. Sánchez

Gómez & M.A. Carrión; Murcia: Sangonera la Seca, Rambla de los Serranos, 37.945 ° N / 1.0 ° W, 2003-04-02, MUB105774, E. Rodriguez.

***Moricandia nitens* (Viv.) E.A. Durand & Barratte.** ISRAEL: Southern Negev, 6 Km S of Zihor junction, 390 m, 1989-03-29, SEV218604, F. Amich, A. Danin, S.G. Gardner & B. Valdés; Negev, Wadi Hurra, 1952-04-03, SEV51605, M. Zohary & J. D'Angelis. MOROCCO: Agouin, 1774 m., 31°10.12' N 7°29.262' W. Matorral del *Hammada hispanica*. GDA62597, 10/04/2014. M. Abdelaziz, M.J. Gómez, J. Lorite & F. Perfectti. Det.: J. Lorite. TUNISIA: Gabès, Djebel Tebaga, base de las colinas a unos 8 Km al S de la carretera GP 16 Gabès Kebili, 33.78 ° N / 9.63 ° W, 150 m, 1992-05-24, SEV218095, C. Benedi, C. Blanché & J. Vallès.

***Moricandia rytidocarpoides* Lorite, Perfectti, Gómez, González-Megías & Abdelaziz sp. nov.** SPAIN: Jaén, Mancha Real, km 32 Jaén-Úbeda, 540 m., JAEN77586, 30SVG48, Carlos Fernández, 10-VI-1977; Ibidem JAEN77586; Jaén, Arroyo Salado, Margas y sales, 440 m., 30SVG4391, JAEN941812, C. Tornero, E. Piñero, E. Moreno et al., 21-V-1994; Jaén: Quesada, Lacra. Margas con yesos, 800 m, 30SVG9285, JAEN942162, L. Morillas, 10-IV-1994; Ibidem, JAEN942172; Ibidem, JAEN942173; Ibidem, JAEN942175; Ibidem, JAEN942187; Jaén: Quesada, Rambla de la Mina, Margas y sal, 480 m., 30SVG8884, JAEN942303, L. Morillas, 08-V-1994; Ibidem, JAEN942304; : Jaén, Quesada, Lacra, Margas con yesos, 800 m, 30SVG9285, L. Morillas, JAEN952074, 16-IV-1995; Ibidem JAEN952074.

***Moricandia spinosa* (Desf.) Coss.** MOROCCO: carretera Missouri- Boulemane, 938 m., 33°2.144' N 4°4.083' W. GDA62598, Matorral del *Hammada hispanica*. 13/04/2014, M. Abdelaziz, M.J. Gómez, J. Lorite & F. Perfectti. Det.: J. Lorite.; Tize-N-Beckanm, 1968-07-06, MA247545-1, Gomez-Campo.

***Moricandia suffruticosa* (Desf.) Coss.** MOROCCO: Rif central, carretera Taza-Aknoul, 850 m., 34°23.836' N 3°54.413' W. Taludes margosos. 13/04/2014. Leg. M. Abdelaziz, M.J. Gómez, J. Lorite & F. Perfectti. Det.: J. Lorite. GDA62599; Tafraute: Anti Atlas mountains, 18 km from Tafraoute on road to Ait Baha, 11.5 km from Ameln, 29.73 ° N / -8.85 ° W, 1460 m, 2007-02-16, MA786486, S.L. Jury & T.M. Upson; Anti Atlas mountains, road to Tata from Igherm, by villages of Tagadirt and Oued Anzrg, 29.94 ° N / -8.52 ° W, 1320 m, 2007-02-14, MA786225, S.L. Jury & T.M. Upson; Ouarzazate: Gorges du Dadès, 1750 m, 1985-01-06, MA302833, C. Blanché, J. Fernández Casas, J. Molero, J.M. Montserrat & A. Romo; Agadir: Souk-el-Tleta d' Afella Irhir, SALA23397, A. Charpin, J. Fdez. Casas, F. Jacquemoud & D. Jeanmonod; TUNISIA: gobernación de Gabès: Metlaoui, gorges de Seldja, 34.33 ° N / 8.32 ° E, 250 m, 2009-03-25, MA796733, A. Herrero & al.; Matmata (Hadege), 1907-02-01, MA50238, C.J. Pitard; Gafsa, Leila, 1909-03-01, MA50239, C.J. Pitard.

***Rytidocarpus moricandioides* Coss.** MOROCCO: Rif central, carretera Taza-Aknoul, 652 m., 34°23.836' N 3°54.413' W. Taludes margosos. 13/04/2014. Leg. M. Abdelaziz, M.J. Gómez, J. Lorite & F. Perfectti. Det.: J. Lorite. GDA62600; Moulay Yacoub, 228 m., 34°7.452' N 5°12.248' W. Taludes margosos. 13/04/2014. Leg. M. Abdelaziz, M.J. Gómez, J. Lorite & F. Perfectti. Det.: J. Lorite. GDA62601

***Eruca pinnatifida* (Desf.) Pomel.** Marruecos, carretera Missouri- Boulemane, 800 m., 33°2.144' N 4°4.083' W. Cultivos sobre suelos arenosos. 13/04/2014. Leg. M. Abdelaziz, M.J. Gómez, J. Lorite & F. Perfectti. Det.: J. Lorite. GDA62602

Figure S1

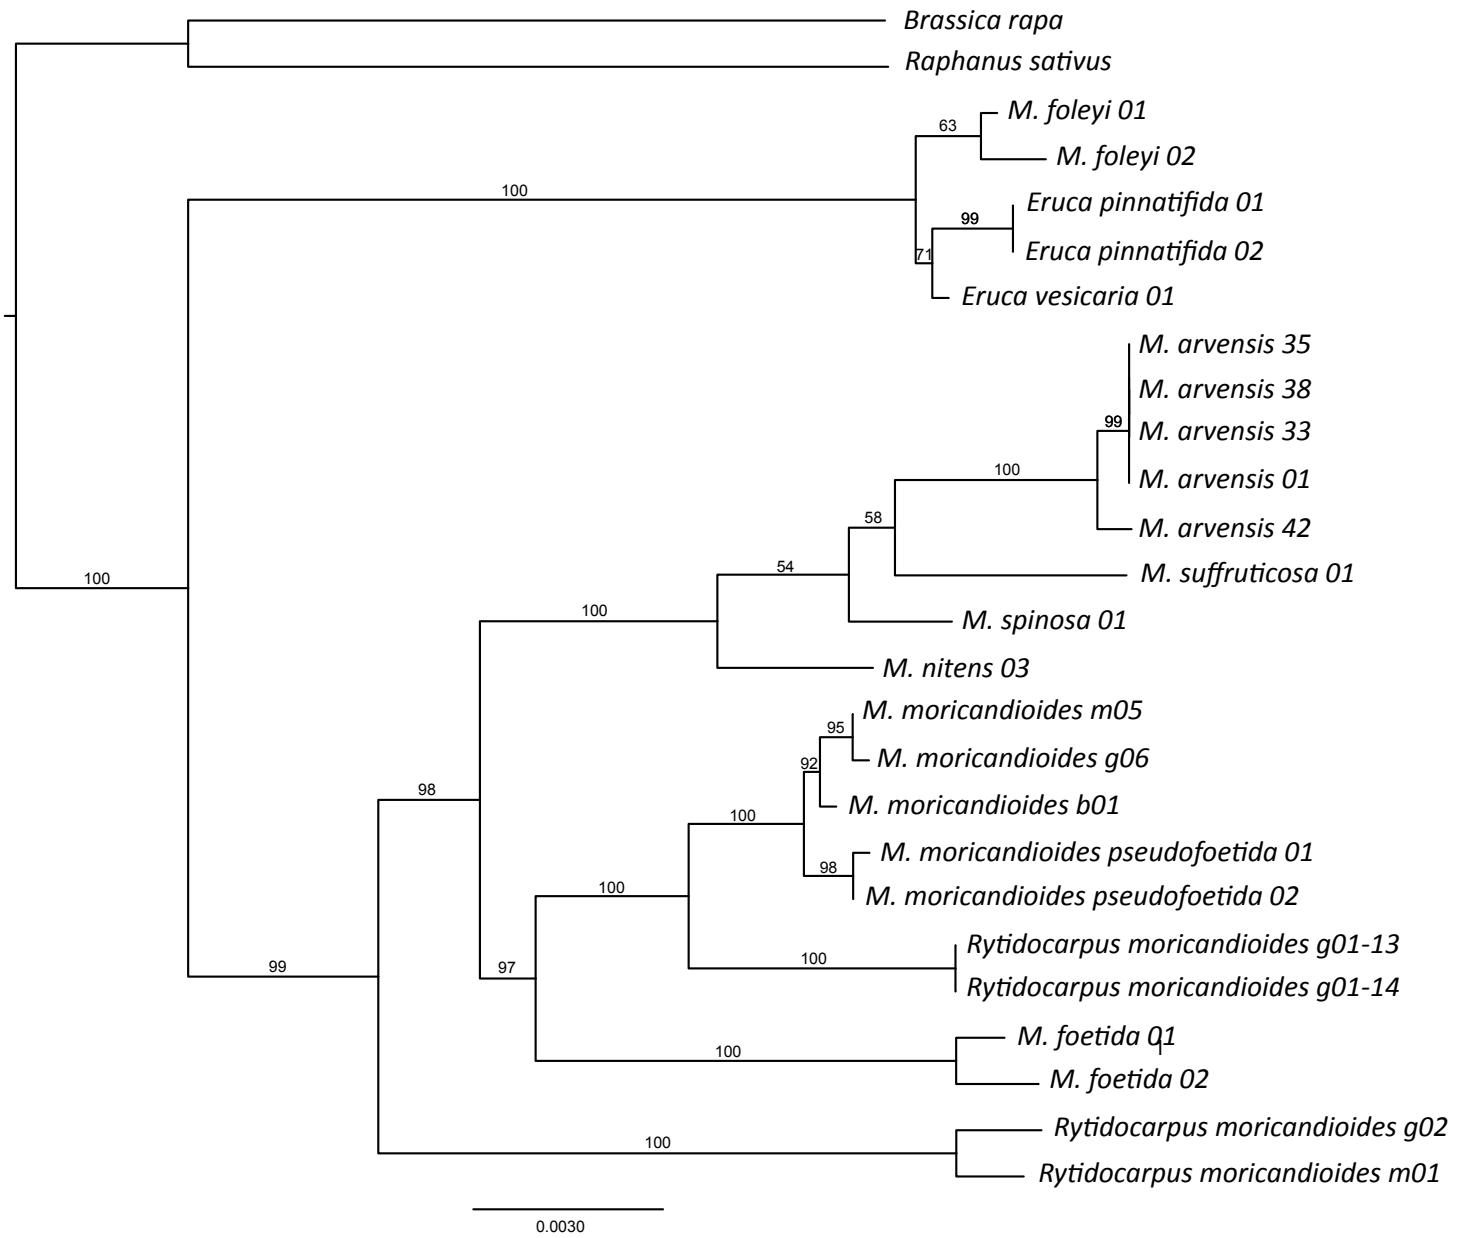



Figure S2

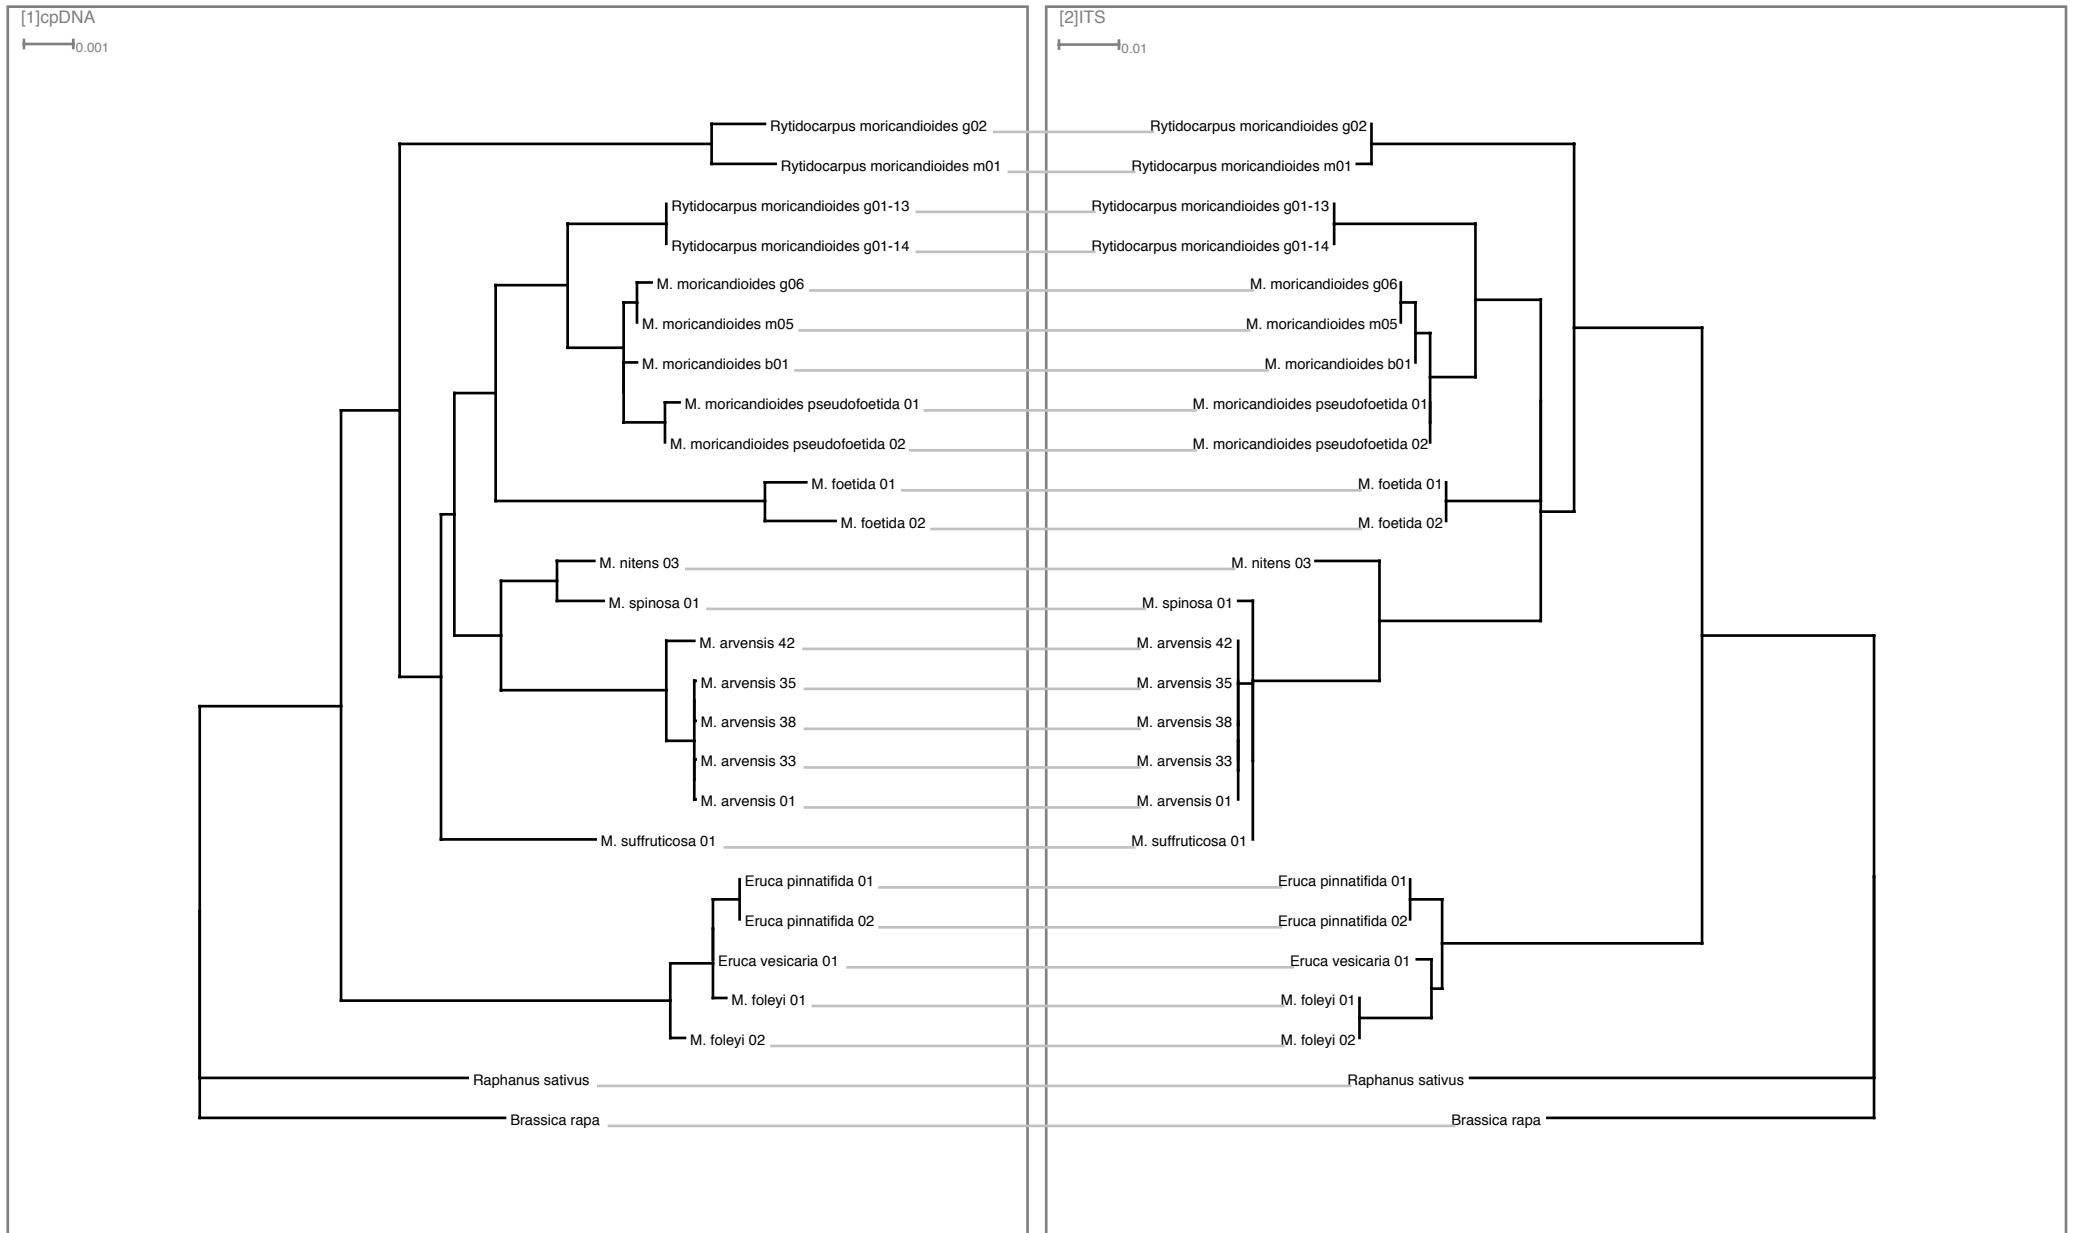

Figure S3

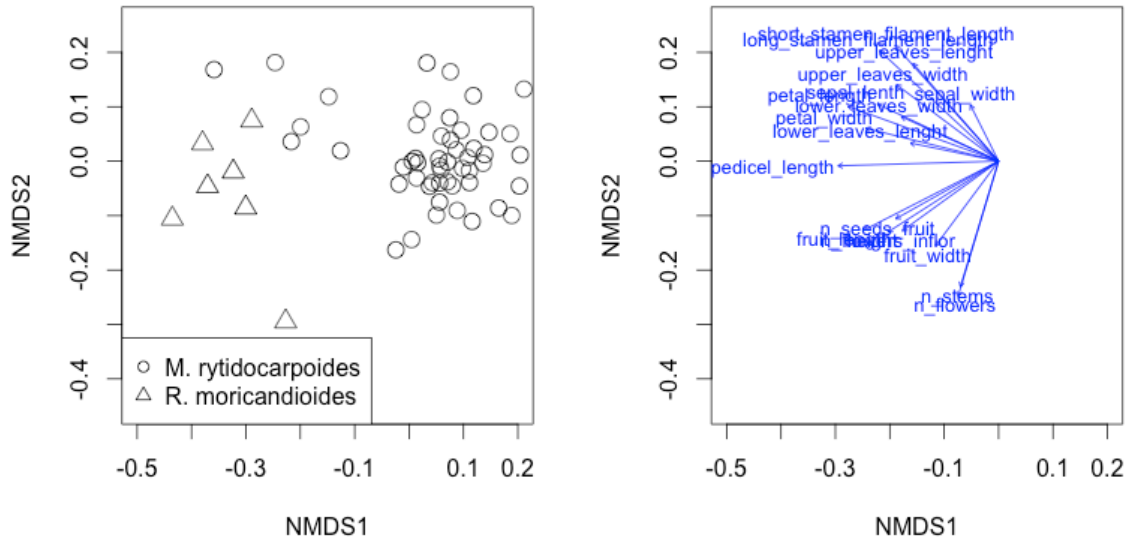

Figure S4

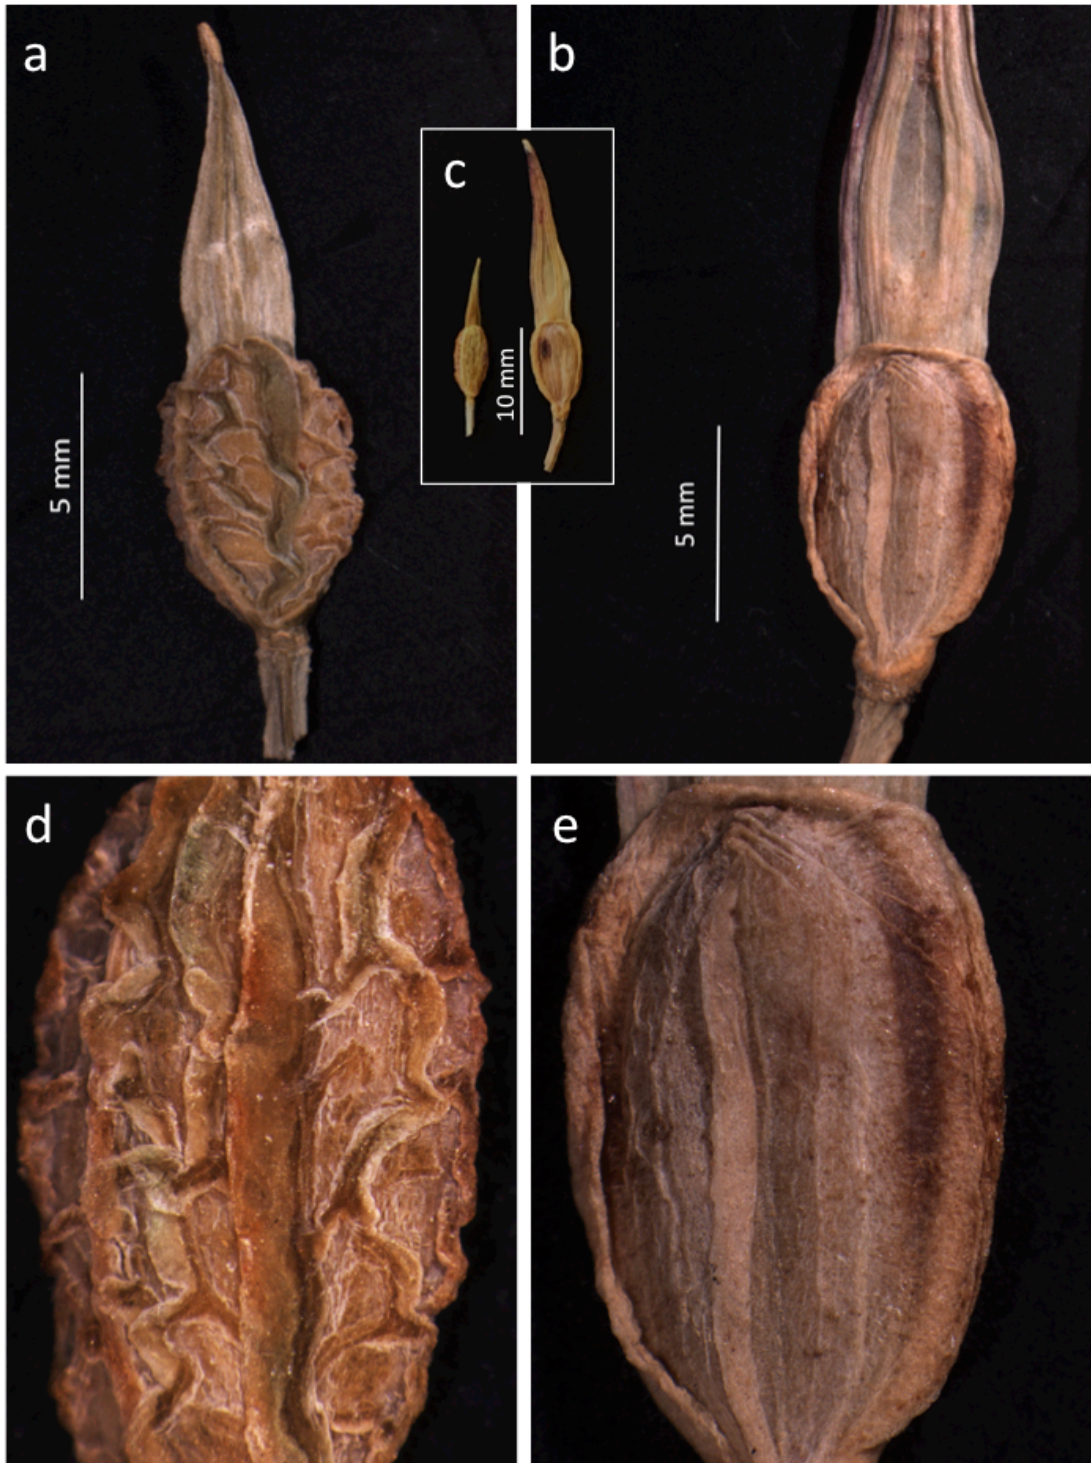

Supplement: Supplementary_Material-Moricandia_phylogeny-R01.pdf [file Supplementary_Material-Moricandia_phylogeny-R01.pdf]
